# Supplementary material
Source: PubMed Central journal article supplement (PMC6879220)
Supplement: AAC.01277-19-s0001.pdf [file AAC.01277-19-s0001.pdf]

Table S1: MICs of antibiotics ( $\mu\text{g/ml}$ ) against WT and LT mutants of *S. aureus* MR23 cultured in BHIG broth.

| Antibiotic                       | WT    | $\Delta isaA$ | $\Delta sceD$ | $\Delta isaA\Delta sceD$ | WT_<br>EV | WT_<br>pCNisaA | WT_<br>pCNsceD | $\Delta isaA$<br>_EV | $\Delta isaA$<br>_pCNisaA | $\Delta isaA$<br>_pCNsceD | $\Delta sceD$<br>_EV | $\Delta sceD$<br>_pCNsceD |
|----------------------------------|-------|---------------|---------------|--------------------------|-----------|----------------|----------------|----------------------|---------------------------|---------------------------|----------------------|---------------------------|
| <b><math>\beta</math>-lactam</b> |       |               |               |                          |           |                |                |                      |                           |                           |                      |                           |
| Oxacillin                        | 16    | 2             | 16            | 1                        | 16        | 16             | 16             | 4                    | 16                        | 4                         | 16                   | 16                        |
| Ampicillin                       | 4     | 0.5           | 4             | 0.5                      | 4         | 4              | 4              | 0.5                  | 4                         | 4                         | 4                    | 4                         |
| Cefazolin                        | 2     | 1             | 2             | 1                        | 4         | 8              | 16             | 1                    | 1                         | 4                         | 2                    | 16                        |
| Cefmetazole                      | 8     | 4             | 8             | 2                        | 8         | 16             | 8              | 4                    | 8                         | 4                         | 8                    | 8                         |
| Flomoxef                         | 4     | 1             | 4             | 1                        | 4         | 2              | 4              | 1                    | 4                         | 2                         | 8                    | 16                        |
| Cefoxitin                        | >16   | 8             | >16           | 8                        | >16       | 16             | >16            | 8                    | 16                        | 16                        | >16                  | >16                       |
| Imipenem                         | <0.25 | <0.25         | <0.25         | <0.25                    | <0.25     | <0.25          | <0.25          | <0.25                | <0.25                     | <0.25                     | <0.25                | <0.25                     |
| <b>Glycopeptide</b>              |       |               |               |                          |           |                |                |                      |                           |                           |                      |                           |
| Vancomycin                       | 2     | 2             | 2             | 2                        | 2         | 4              | 2              | 2                    | 2                         | 2                         | 2                    | 2                         |
| Teicoplanin                      | 2     | 2             | 2             | 2                        | 2         | 2              | 2              | 2                    | 2                         | 2                         | 2                    | 2                         |
| <b>Oxazolidinone</b>             |       |               |               |                          |           |                |                |                      |                           |                           |                      |                           |
| Linezolid                        | 2     | 1             | 1             | 1                        | 2         | 2              | 2              | 2                    | 2                         | 2                         | 2                    | 2                         |
| <b>Lincomycin</b>                |       |               |               |                          |           |                |                |                      |                           |                           |                      |                           |
| Clindamycin                      | 0.25  | 0.12          | 0.25          | 0.12                     | 0.25      | 0.25           | 0.25           | 0.12                 | 0.25                      | 0.12                      | 0.25                 | 0.5                       |

WT: wild type;  $\Delta isaA$ : *isaA*-deleted strain;  $\Delta sceD$ : *sceD*-deleted strain;  $\Delta isaA\Delta sceD$ : *isaA* and *sceD*-deleted strain; EV: pCN51Cm (empty vector); pCNisaA: pCN51Cm containing *isaA*; pCNsceD: pCN51Cm containing *sceD*.

Table S2: Primers used in this study.

| Primer              | Sequence (5' to 3')                                         | Description                          |
|---------------------|-------------------------------------------------------------|--------------------------------------|
| sceD_F              | AAGGAGATATACATAATGAGTGAAGCGGACTTAAATAAAGCA                  | For construction of pETsceD          |
| sceD_R              | GGTGGTGGTGCTCGAGTGCAGTAACCCAATGTCCAG                        |                                      |
| pCN51_iv_F          | GTCGGCTTAAACCAGTTTTCC                                       | For construction of pCN51Cm          |
| pCN51_iv_R          | GTAGCATGTCTCATTCAATTCCTAGG                                  |                                      |
| pKOR1_CAT_F         | AATGAGACATGCTACCGTCTTCTTAATATGCGTAATTGCA                    | For construction of pCN51Cm          |
| pKOR1_CAT_R         | CTGGTTTAAGCCGACGATATCCCCGTATAGTGAGTCGTATTAC                 |                                      |
| attB1_isaA_up_F     | GGGACAAGTTTGTACAAAAAAGCAGGCTCTAAGATTGTCATATCAATTATTATTGCATC | For <i>isaA</i> deletion using pKOR1 |
| isaA_up_SOE_R       | GGAGGATTTTTACTTTCCTTCATAATAAATAAAAGTAATGTTTAGACATTA         |                                      |
| SOE_isaA_down_F     | TTTATTATGAAGGAAAGTAAAAATCCTCCAGTAATAATTGTAAGTTTAT           |                                      |
| isaA_down_attB2_R   | GGGACCACTTTGTACAAGAAAGCTGGGTGATTCTGCTTGTTGAGTGTCTTAC        |                                      |
| attB1_sceD_up_F     | GGGACAAGTTTGTACAAAAAAGCAGGCTGGCGTAATGCGTCAGCTC              | For <i>sceD</i> deletion using pKOR1 |
| SceD_up_SOE_R       | GAGGATTTAAGATTGCCATTGCCATTTATGCATAGCTAATTAATAGTTATATAAGTAAC |                                      |
| SOE_sceD_down_F     | CTATGCATAAATGGCAATCTTAAAATCCTCCTACAAGTAATTTGTT              |                                      |
| sceD_down_attB2_R   | GGGACCACTTTGTACAAGAAAGCTGGGTTGAAACAATAAAATTATGTCCCCTAA      |                                      |
| attB1_mecA_up_F     | GGGACAAGTTTGTACAAAAAAGCAGGCTCGTGGAGACGAGCACTAATAACC         | For <i>mecA</i> deletion using pKOR1 |
| mecA_up_SOE_R       | TGCTTCACTGTTTTGTTTATATTGAGCATCTACTCGTTTTTTTATTTTTA          |                                      |
| SOE_mecA_down_F     | GATGCTCAATATAAACAAAACAGTGAAGCAATCCGTAAC                     |                                      |
| mecA_down_attB2_R   | GGGACCACTTTGTACAAGAAAGCTGGGTTGACGGTAGACTTACCTTTAACATGTTACA  |                                      |
| isaA_fusion_pCN51_F | CGACTCTAGAGGATCAAGGGTTGATTGGATTCTAAAGG                      | For construction of pCNisaA          |
| isaA_fusion_pCN51_R | AGGCGCGCCTGAATTTTAGAATCCCCAAGCACCTAAA                       |                                      |
| sceD_fusion_pCN51_F | CGACTCTAGAGGATCAGACATAGATTGCAAAACGATTACA                    | For construction of pCNsceD          |
| sceD_fusion_pCN51_R | AGGCGCGCCTGAATTTTATGCAGTAACCCAATGTCCA                       |                                      |
| mecA_fusion_pCN51_F | CGACTCTAGAGGATCATATAAGGAGGATATTGATGAAAAAGATAAAA             | For construction of pCNmecA          |
| mecA_fusion_pCN51_R | AGGCGCGCCTGAATTTTATTCATCTATATCGTATTTTTTATTACCGTT            |                                      |

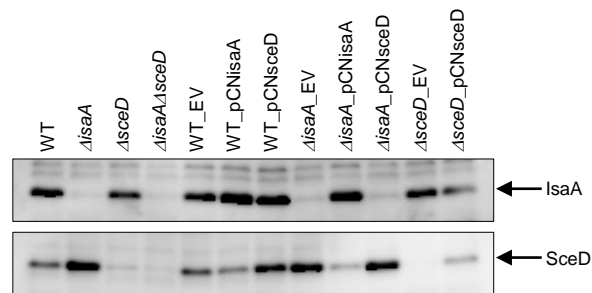

**FIG S1** Western blot showing levels of IsaA and SceD in whole-cell fractions of *S. aureus* MR23 and LT mutants. WT, wild-type; EV, pCN51Cm (empty vector); pCNisaA, pCN51Cm containing *isaA*; pCNsceD, pCN51Cm containing *sceD*.

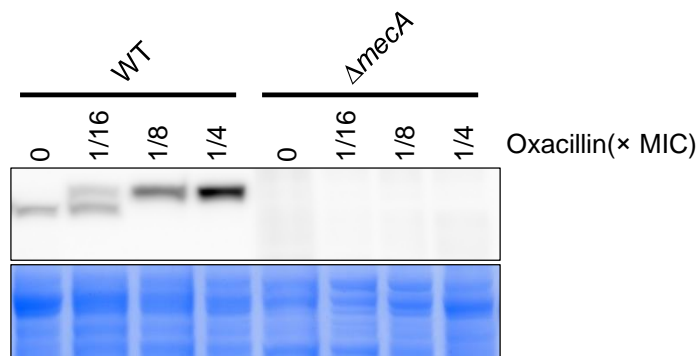

**FIG S2** Western blot showing levels of PBP2a in wild-type (WT) and *mecA*-deletion mutant ( $\Delta$ *mecA*) of *S. aureus* MR23. Concentrations of oxacillin used for induction are indicated above the panels. As a loading controls, a CBB-stained image gel of the same area was is shown below the panel.

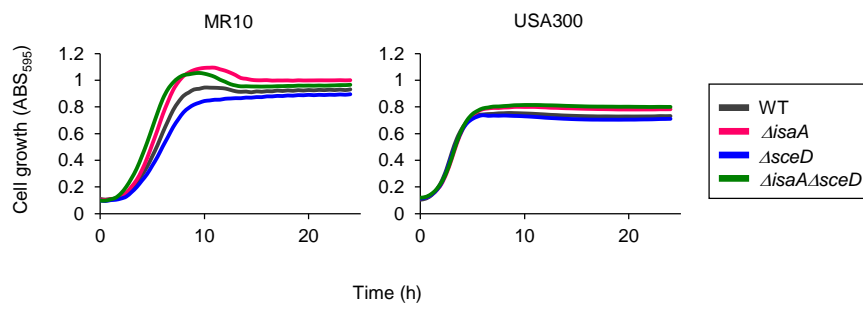

**FIG S3** Effect of LT gene deletion on cell of *S. aureus* MR10 and USA300. The average of three independent cultures is shown.
